# Supplementary material for: ZmpTAC12 binds single‐stranded nucleic acids and is essential for accumulation of the plastid‐encoded polymerase complex in maize
Source: PubMed Central journal article supplement (PMC6680207; doi:10.1111/nph.13248), 2015-01-19
Supplement: NPH-206-1024-s002.pdf [file NPH-206-1024-s002.pdf]

## Supporting Information Tables S1–S3

**Table S1** List of primers used in this study.

| Gene locus                             | Clone         | Primer            | Sequence                                                      |
|----------------------------------------|---------------|-------------------|---------------------------------------------------------------|
| <b>pet28_ZmpTAC12</b>                  |               |                   |                                                               |
| <i>ZmpTAC12</i>                        | ZM_BFb0227G12 | ZmpTAC12_NdeI     | 5'-GCCACATATGCCAGCTACTTCGAC-3'                                |
|                                        |               | ZmpTAC12_Sall_k   | 5'-GGATCGTCGACCTAATTAATTGTTG-3'                               |
| <b>pMAL_ZmpTAC12</b>                   |               |                   |                                                               |
| <i>ZmpTAC12</i>                        | ZM_BFb0227G12 | ZmpTAC12_BglII    | 5'-GACCCGAGATCTATAGAACC GCCAC-3'                              |
|                                        |               | ZmpTAC12_PstI     | 5'-TGTCCTGCAGTTACTCGGTTCC-3'                                  |
| <b>pEnter221_Zm12-14</b>               |               |                   |                                                               |
| <i>ZmpTAC12</i>                        | ZM_BFb0227G12 | Zmptac12-f-TOPO_1 | 5'-GGGGACAAGTTTGTACAAAAAAGCAGGCTCCAT<br>GGCGTCTGCTACAACC-3'   |
|                                        |               | Zmptac12-r-TOPO_2 | 5'-GGGGACCACCTTGTACAAGAAAGCTGGGTATGA<br>CTCGGTTTCCTCAAAGTC-3' |
| <b>run on, slot blots and Northern</b> |               |                   |                                                               |
| <u>oligo probes</u>                    |               |                   |                                                               |
| <i>psaAB</i>                           |               | ZmpsaAB-150_r     | 5'-CTATCTACCGTCCTTCTATTTTTTTTTTTAGTTA<br>TTCCTGGAGCAATTA-3'   |
| <i>psaAB</i>                           |               | ZmpsaAB-190_r     | 5'-GGAGCAATTATATATTGAAGTCAATCCGAGGC<br>AAGTGTTCGGATCTATTA-3'  |
| <i>psaAB</i>                           |               | ZmpsaAB-231_r     | 5'-GATCTATTATGACATAAAGGATTAGGTGCCTAA<br>CGGACATTGGTTATTCTG-3' |
| <i>psbA</i>                            |               | ZmpsbA ORF1_r     | 5'-TGTTGCATATTCAGCTCCTGTTGCAGCTGC-3'                          |
| <i>psbE</i>                            |               | ZmpsbE ORF2_r     | 5'-GCATTACTATACCTTCCCTATTCATTGCGG-3'                          |
| <i>trnA-U</i>                          |               | ZmtrnA_UGC_r      | 5'-GGAGATAAGCGGACTCGAACCCTGACATC-3'                           |
| <i>trnG-UCC</i>                        |               | ZmtrnG_UCC_r      | 5'-GAACCCGCATCGTTAGCTTGAAGGCTAGG-3'                           |
| <i>trnI-GAU</i>                        |               | ZmtrnI_GAU_r      | 5'-GCCATCCTGGACTTGAACCAGAGACCTCGC-3'                          |
| <i>trnV-UAC</i>                        |               | ZmtrnV_UAC_r      | 5'-GAGTTGCTCTACCGAACTGAGCTATAGCCC-3'                          |
| <i>trnE-UUC</i>                        |               | ZmtrnE_UUC_r      | 5'-GAGAGATGTCCTGAACCACTAGACGATGGG-3'                          |
| <u>PCR probes</u>                      |               |                   |                                                               |
| <i>ptac12</i>                          |               | Zmptac12_for2     | 5'-ACAACCTCCTTCCACGTGAG-3';                                   |
|                                        |               | Zmptac12_r3       | 5'-AATAGGCGCCACGGGTTGTA-3'                                    |
| <i>ptac12</i>                          | ZM_BFb0227G12 | Zmptac12_f        | 5'-CGTTCATTGATCCAGCAAAGG-3';                                  |
|                                        |               | Zmptac12_r        | 5'-ATTCCCCAGCAGTTTGGTGTT-3'                                   |
| <i>ptac12</i>                          | ZM_BFb0227G12 | Zmptac12_f2       | 5'-ATGGCGTCTGCTACAACC-3';                                     |
|                                        |               | Zmptac12_r2       | 5'-CGGTTTCCTCAAAGTCCATAAG-3'                                  |
| <i>atpB</i>                            |               | ZmatpBE_f         | 5'-TTTGATAGTCAAGAGTCGAGA-3';                                  |
|                                        |               | ZmatpBE_r         | 5'-TTTCCTTACAGTCCGTTTC-3'                                     |
| <i>ndhB</i>                            |               | ZmndhB_f          | 5'-CTTCAGCTTTAGCCACGCGAA-3';                                  |
|                                        |               | ZmndhB_r          | 5'-AATTGCAAGAATGGGGTTCA-3'                                    |
| <i>petB</i>                            |               | ZmpetB_f          | 5'-GTCTTGAGATTCAGGCAATTGCAGATG-3';                            |
|                                        |               | ZmpetB_r          | 5'-GCAGTAAGCAGAGGTAGTACAAAGGTATGT-3'                          |
| <i>petG/psaJ</i>                       |               | ZmpetG_f          | 5'-TCCCCTCGAACAATCGAAATGATTGA-3';                             |
|                                        |               | ZmpsaJ_r          | 5'-GGGAATGACAAAGCATCTGGGA-3'                                  |
| <i>psaAB</i>                           |               | ZmpsaAB_f         | 5'-GGGTTTTACAGTTTTGGCTT-3';                                   |
|                                        |               | ZmpsaAB_r         | 5'-CCCAAACATCCGACTGCATTT-3'                                   |
| <i>psbA</i>                            |               | ZmpsbA_f          | 5'-CTTCTGCGGCGATAGGGTTGC-3';                                  |
|                                        |               | ZmpsbA_r          | 5'-CATTTCAGTGGTTTCCCTGA-3'                                    |
| <i>psbB</i>                            |               | ZmpsbB_f          | 5'-GCGGACGTTCTTTTAGAAG-3';                                    |
|                                        |               | ZmpsbB_r          | 5'-GAGCGCCATGCCAAATGTGT-3'                                    |
| <i>psbE</i>                            |               | ZmpsbE_f          | 5'-GTCTGGAAGCACGGGAGAACG-3';                                  |
|                                        |               | ZmpsbE_r          | 5'-TTCATCTAGTTGTTCTAAAGAA-3'                                  |
| <i>rpl2</i>                            |               | Zmrpl2_f          | 5'-CCGTAGACAGGCAAGTGAAATC-3';                                 |
|                                        |               | Zmrpl2_r          | 5'-TATGTATGGCCGTGCCTAAG-3'                                    |

|                     |             |                                       |
|---------------------|-------------|---------------------------------------|
| <i>rpoB</i>         | ZmrpoB_f    | 5'-GGAATGGAAATGAGGGAATGTCCAC-3';      |
|                     | ZmrpoB_r    | 5'-GACTCAATCCTCTTCTTCTCCTTAGCATT-3'   |
| <i>rps2</i>         | Zmrps2_f    | 5'-GAAAGAGATGATAGAAGCGGGAGTTC-3';     |
|                     | Zmrps2_r    | 5'-GAATTGAAGTCATAGTGTTCATCGTTGGCAG-3' |
| <i>rps12</i> exon   | Zmrps12ex_f | 5'-GCCCTTGTTGACGATTCTTTAC-3';         |
|                     | Zmrps12ex_r | 5'-GACTTTTCCACTATCAACCCC-3'           |
| <i>rps12</i> intron | Zmrps12in_f | 5'-GGGTGGATTCGAAAAGATAGG-3';          |
|                     | Zmrps12in_r | 5'-GCCATGTGAATCGCTAGAAAC-3'           |
| <i>rps14</i>        | Zmrps14_f   | 5'-TCATTTGATTCTCGATCCTC-3';           |
|                     | Zmrps14_r   | 5'-GTATTTTATCCTTACCAACTG-3'           |
| <i>rrn16</i>        | Zmrrn16_f   | 5'-GGAGAGTTCGATCCTG-3';               |
|                     | Zmrrn16_r   | 5'-GCTTTACGCCCAATCATTCC-3'            |

### RNA binding assays

|              |             |                                                                                      |
|--------------|-------------|--------------------------------------------------------------------------------------|
| T7 promoter  | T7 promoter | 5'-GAAACTAATACGACTCACTATAGG-3'                                                       |
| <i>psaAB</i> | ZmpsAB-150  | 5'-CTATCTACCGTCCTTCTATTTTTTTTTTTAGTTATTCAC<br>TGGAGCAATTACCTATAGTGAGTCGTATTAGTTTC-3' |
| <i>psaAB</i> | ZmpsAB-190  | 5'-GGAGCAATTATATATTGAAGTCAATCCGAGGCAAGTG<br>TTCGGATCTATTACCTATAGTGAGTCGTATTAGTTTC-3' |
| <i>psaAB</i> | ZmpsAB-231  | 5'-GATCTATTATGACATAAGGATTAGGTGCCTAACGGAC<br>ATTGGTTATTCTGCCTATAGTGAGTCGTATTAGTTTC-3' |

### DNA binding assays

|              |            |                                                               |
|--------------|------------|---------------------------------------------------------------|
| <i>psaAB</i> | ZmpsAB-150 | 5'-TAATTGCTCCAGTGAATAACTAAAAAAAAAATAGAAG<br>GACGGTAGATAG-3'   |
| <i>psaAB</i> | ZmpsAB-190 | 5'-TAATAGATCCGAACACTTGCCCTCGGATTGACTTCAATA<br>TATAATTGCTCC-3' |
| <i>psaAB</i> | ZmpsAB-231 | 5'-CAGAATAACCAATGTCCGTTAGGCACCTAATCCTTATG<br>TCATAATAGATC-3'  |

**Table S2** Liquid chromatography-electrospray ionization-tandem mass spectrometry (LC-ESI-MS/MS) confirmed the identity the ZmpTAC12 protein.

Protein samples (PEP-complex preparation by a two-step chromatographic method) were separated by 10% SDS-PAGE and stained with Colloidal Blue (Staining Kit from Invitrogen GmbH). Bands were excised and the proteins *in gel* tryptic digested. Peptides were eluted and analyzed by LC-ESI-MS/MS according to Schmidt et al. 2006. For the data analysis, the Proteome Discoverer vs. 1.4 (Thermo Fisher Scientific Inc.) along with a database containing only the full length ZmpTAC amino acid sequence was used. The cut off XCorr criteria along with the false discovery rate of  $\leq 1\%$  were set according to Mann et al., 2014. The two N-terminal peptides that were only identified in the large ZmpTAC12 isoform (~75 kDa band) are highlighted in red.

<sup>a</sup> Peptide position in the ZmpTAC12 sequence

<sup>b</sup> Cross-correlation values

<sup>c</sup> Peptide charge

<sup>d</sup> Peptide identified in independent preparations (I and II)

| Protein ID             | Position <sup>a</sup>    | Sequence                  | XCorr <sup>b</sup> | Charge <sup>c</sup> | Sample <sup>d</sup> |
|------------------------|--------------------------|---------------------------|--------------------|---------------------|---------------------|
| ZmpTAC12-S<br>~ 65 kDa | 227-236                  | TSEELWWHWR                | 2,73               | 2                   | II                  |
|                        | 251-261                  | RRPDVDTVFAK               | 3,08               | 3                   | I                   |
|                        |                          | RPDVDTVFAK                | 3,25               | 3                   | II                  |
|                        | 252-261                  | RPDVDTVFAK                | 3,30               | 2                   | I                   |
|                        |                          | RPDVDTVFAK                | 3,28               | 3                   | II                  |
|                        | 303-320                  | LEEIGPIAYYSEWVEAYK        | 3,80               | 2                   | II                  |
|                        | 332-346                  | HFEETGEDENVQLIK           | 5,50               | 2                   | I                   |
|                        |                          | HFEETGEDENVQLIK           | 5,68               | 2                   | II                  |
|                        | 442-455                  | EDVNQDITYPEAK             | 3,28               | 2                   | I                   |
|                        |                          | EDVNQDITYPEAK             | 3,05               | 3                   | II                  |
| 507-515                | VNQNWSALK                | 2,68                      | 2                  | I                   |                     |
|                        | VNQNWSALK                | 2,70                      | 2                  | II                  |                     |
| ZmpTAC12-L<br>~ 75 kDa | 62-71                    | DDSLHFDPSK                | 3,08               | 2                   | I                   |
|                        |                          | DDSLHFDPSK                | 2,67               | 2                   | II                  |
|                        | 72-95                    | IEPPYSSYFDSTSGQLEPASGAR   | 2,84               | 2                   | II                  |
|                        | 227-236                  | TSEELWWHWR                | 3,04               | 2                   | II                  |
|                        | 239-247                  | SQEEEMWSR                 | 2,60               | 2                   | II                  |
|                        | 251-261                  | RRPDVDTVFAK               | 3,40               | 3                   | I                   |
|                        |                          | RRPDVDTVFAK               | 3,40               | 3                   | II                  |
|                        | 252-261                  | RPDVDTVFAK                | 3,34               | 2                   | II                  |
|                        |                          | RPDVDTVFAK                | 3,34               | 2                   | II                  |
|                        | 303-320                  | LEEIGPIAYYSEWVEAYK        | 3,19               | 2                   | II                  |
|                        | 332-346                  | HFEETGEDENVQLIK           | 5,82               | 2                   | I                   |
|                        |                          | HFEETGEDENVQLIK           | 5,60               | 2                   | II                  |
|                        | 347-357                  | MFQHQTAGEYR               | 3,08               | 3                   | I                   |
|                        | 382-406                  | QIWGGDPVYPTINYVQDPDEVIDYR | 4,09               | 2                   | II                  |
| 442-455                | EDVNQDITYPEAK            | 3,05                      | 2                  | I                   |                     |
|                        | EDVNQDITYPEAK            | 3,69                      | 2                  | II                  |                     |
| 483-506                | AAAQPSLEDE EDDRDDVAEVEEK | 3,09                      | 3                  | I                   |                     |
| 507-515                | VNQNWSALK                | 2,86                      | 2                  | II                  |                     |

**Mann M, Hoppenz P, Jakob T, Weisheit W, Mittag M, Wilhelm C, Goss R.** 2014. Unusual features of the high light acclimation of *Chromera velia*. *Photosynth Res* 122:159-69.

**Schmidt M, Gessner G, Luff M, Heiland I, Wagner V, Kaminski M, Geimer S, Eitzinger**

**N, Reissenweber T, Voytsekh O, Fiedler M, Mittag M, Kreimer G.** 2006. Proteomic analysis of the eyespot of *Chlamydomonas reinhardtii* provides novel insights into its components and tactic movements. *Plant Cell* 18: 1908-1930.

**Table S3** Top-ranking fragments in ZmpTAC12 RIP-chip assays.<sup>a</sup> Fragments on the array are numbered according to chromosomal position.<sup>b</sup> Median  $\log_2$  (F635/F532) normalized across the experimental (anti-ptac12-a and anti-pTAC12-b) and control (anti-psaAB) immunoprecipitations. Replicate experiments constitute a total of *N* replicate spots above background.

| anti-pTAC12-a IP     |                |                                                     |                | anti-pTAC12-b IP     |               |                                                     |                |
|----------------------|----------------|-----------------------------------------------------|----------------|----------------------|---------------|-----------------------------------------------------|----------------|
| Frag. # <sup>a</sup> | Fragment name  | Median $\log_2$ ratio <sup>b</sup> (ZmpTAC12-PsaAB) | N <sup>b</sup> | Frag. # <sup>a</sup> | Fragment name | Median $\log_2$ ratio <sup>b</sup> (ZmpTAC12-PsaAB) | N <sup>b</sup> |
| 2                    | psbA2          | 7,14                                                | 6              | 1                    | psbA1         | 6,52                                                | 6              |
| 1                    | psbA1          | 7,14                                                | 6              | 2                    | psbA2         | 6,45                                                | 6              |
| 3                    | psbA3          | 6,16                                                | 6              | 71                   | rps14-1       | 6,08                                                | 6              |
| 249                  | IR/psbA        | 5,97                                                | 6              | 120                  | psbF/E        | 5,96                                                | 6              |
| 80                   | ycf3-3         | 5,81                                                | 6              | 72                   | rps14/psaB    | 5,89                                                | 6              |
| 192                  | rps12-3        | 5,80                                                | 5              | 77                   | psaA-2        | 5,44                                                | 5              |
| 120                  | psbF/E         | 5,69                                                | 6              | 65                   | atpF3         | 5,38                                                | 6              |
| 77                   | psaA-2         | 5,56                                                | 6              | 249                  | IR/psbA       | 5,27                                                | 6              |
| 119                  | psbJ/L/F/E     | 5,32                                                | 6              | 3                    | psbA3         | 5,26                                                | 6              |
| 136                  | psbB-1         | 5,22                                                | 6              | 119                  | psbJ/L/F/E    | 5,23                                                | 6              |
| 79                   | ycf3-2         | 5,18                                                | 6              | 80                   | ycf3-3        | 5,22                                                | 4              |
| 65                   | atpF3          | 5,17                                                | 4              | 189                  | ndhB/rps7     | 5,05                                                | 3              |
| 134                  | clpP/psbB      | 5,15                                                | 6              | 132                  | rps12int1-1   | 4,77                                                | 4              |
| 72                   | rps14/psaB     | 5,02                                                | 6              | 79                   | ycf3-2        | 4,49                                                | 4              |
| 138                  | psbB/psbT/psbN | 4,98                                                | 5              | 195                  | rps125'       | 4,41                                                | 6              |
| 135                  | clpP           | 4,98                                                | 3              | 122                  | petL          | 4,39                                                | 6              |
| 195                  | rps125'        | 4,92                                                | 6              | 67                   | atpF/atpA     | 4,31                                                | 6              |
| 122                  | petL           | 4,91                                                | 5              | 13                   | psbK/psbI     | 4,17                                                | 6              |
| 232                  | ndhD-2         | 4,87                                                | 2              | 58                   | atpI/atpH     | 4,12                                                | 6              |
| 67                   | atpF/atpA      | 4,84                                                | 6              | 97                   | ndhK/ndhC     | 4,09                                                | 6              |
| 71                   | rps14-1        | 4,76                                                | 6              | 16                   | psbD1         | 4,07                                                | 6              |
| 169                  | rpl2int        | 4,75                                                | 5              | 131                  | rpl20         | 4,06                                                | 5              |
| 137                  | psbB-2         | 4,69                                                | 4              | 136                  | psbB-1        | 4,02                                                | 6              |
| 16                   | psbD1          | 4,63                                                | 6              | 137                  | psbB-2        | 3,99                                                | 6              |
| 75                   | psaB/psaA      | 4,60                                                | 5              | 75                   | psaB/psaA     | 3,97                                                | 5              |
| 76                   | psaA-1         | 4,60                                                | 5              | 235                  | psaC-2        | 3,97                                                | 6              |
| 235                  | psaC-2         | 4,58                                                | 6              | 81                   | ycf3-4        | 3,89                                                | 3              |
| 58                   | atpI/atpH      | 4,56                                                | 3              | 104                  | atpB-2        | 3,86                                                | 6              |
| 191                  | rps12-1        | 4,52                                                | 5              | 60                   | atpH2         | 3,86                                                | 6              |
| 13                   | psbK/psbI      | 4,44                                                | 6              | 133                  | rps12exon1    | 3,84                                                | 6              |
| 168                  | rpl2-1         | 4,44                                                | 6              | 192                  | rps12-3       | 3,83                                                | 4              |
| 194                  | rps12exon2     | 4,39                                                | 6              | 232                  | ndhD-2        | 3,77                                                | 3              |
| 193                  | rps12int2-1    | 4,37                                                | 5              | 112                  | ycf4-1        | 3,72                                                | 5              |
| 97                   | ndhK/ndhC      | 4,32                                                | 6              | 134                  | clpP/psbB     | 3,71                                                | 5              |
| 133                  | rps12exon1     | 4,24                                                | 6              | 36                   | psbM1         | 3,71                                                | 6              |
| 81                   | ycf3-4         | 4,22                                                | 5              | 63                   | atpFintron2   | 3,65                                                | 5              |

|     |                 |      |   |     |                 |      |   |
|-----|-----------------|------|---|-----|-----------------|------|---|
| 230 | ycf5-2          | 4,21 | 3 | 191 | rps12-1         | 3,62 | 4 |
| 189 | ndhB/rps7       | 4,21 | 6 | 244 | ndhAint         | 3,59 | 5 |
| 112 | ycf4-1          | 4,20 | 4 | 78  | ycf3-1          | 3,55 | 3 |
| 82  | ycf3/trnS       | 4,16 | 4 | 68  | atpA3'          | 3,53 | 5 |
| 8   | rps16 intron    | 4,13 | 4 | 106 | rbcL-1          | 3,52 | 6 |
| 132 | rps12int1-1     | 4,12 | 4 | 61  | atpF1           | 3,51 | 6 |
| 104 | atpB-2          | 4,12 | 6 | 188 | ndhB5'          | 3,50 | 2 |
| 131 | rpl20           | 4,07 | 4 | 64  | atpH/atpF       | 3,50 | 5 |
| 68  | atpA3'          | 4,06 | 5 | 74  | psaB-2          | 3,48 | 6 |
| 114 | cemA            | 4,02 | 5 | 103 | atpE/B          | 3,47 | 6 |
| 113 | ycf4-2          | 4,02 | 2 | 82  | ycf3/trnS       | 3,45 | 6 |
| 170 | rpl2-2          | 4,01 | 4 | 66  | atpA1           | 3,39 | 6 |
| 74  | psaB-2          | 4,01 | 6 | 233 | ndhD-3          | 3,38 | 4 |
| 106 | rbcL-1          | 3,99 | 6 | 95  | ndhJ/ndhK       | 3,37 | 5 |
| 103 | atpE/B          | 3,97 | 4 | 135 | clpP            | 3,37 | 6 |
| 59  | atpH1           | 3,96 | 6 | 59  | atpH1           | 3,35 | 6 |
| 245 | ndhA-2          | 3,93 | 4 | 126 | psaJ-2          | 3,34 | 6 |
| 60  | atpH2           | 3,92 | 6 | 185 | ndhB-2          | 3,31 | 3 |
| 17  | psbD2           | 3,91 | 6 | 123 | petE            | 3,28 | 6 |
| 57  | atpI-2          | 3,86 | 4 | 96  | ndhK            | 3,27 | 4 |
| 123 | petE            | 3,85 | 6 | 18  | psbC/trnS       | 3,25 | 6 |
| 40  | petN3           | 3,84 | 5 | 116 | petA-1          | 3,25 | 5 |
| 107 | rbcL-2          | 3,83 | 6 | 230 | ycf5-2          | 3,22 | 6 |
| 149 | petDint-1       | 3,82 | 5 | 190 | rps7-1          | 3,19 | 6 |
| 73  | psaB-1          | 3,81 | 4 | 187 | ndhBint-2       | 3,18 | 3 |
| 78  | ycf3-1          | 3,81 | 6 | 56  | atpI-1          | 3,15 | 6 |
| 188 | ndhB5'          | 3,78 | 2 | 114 | cemA            | 3,15 | 5 |
| 61  | atpF1           | 3,77 | 5 | 156 | rpl36/infA/rps8 | 3,13 | 4 |
| 244 | ndhAint         | 3,75 | 2 | 57  | atpI-2          | 3,10 | 5 |
| 127 | psaJ/rpl33      | 3,73 | 2 | 138 | psbB/psbT/psbN  | 3,10 | 6 |
| 213 | rrn23-4         | 3,73 | 6 | 73  | psaB-1          | 3,09 | 5 |
| 95  | ndhJ/ndhK       | 3,71 | 4 | 186 | ndhBintron      | 3,06 | 4 |
| 66  | atpA1           | 3,71 | 4 | 17  | psbD2           | 3,06 | 6 |
| 53  | rpoC2/rps2      | 3,69 | 2 | 127 | psaJ/rpl33      | 3,05 | 6 |
| 98  | trnV-UAC-1      | 3,68 | 5 | 12  | trnQ/psbK       | 3,01 | 6 |
| 121 | psbE5'          | 3,60 | 6 | 121 | psbE5'          | 3,00 | 6 |
| 214 | rrn4.5          | 3,54 | 6 | 113 | ycf4-2          | 3,00 | 3 |
| 12  | trnQ/psbK       | 3,53 | 6 | 183 | ndhB3'          | 2,98 | 4 |
| 156 | rpl36/infA/rps8 | 3,52 | 4 | 170 | rpl2-2          | 2,97 | 5 |
| 6   | trnkintron      | 3,51 | 6 | 54  | rps2-1          | 2,96 | 6 |
| 18  | psbC/trnS       | 3,48 | 5 | 108 | rbcL-3          | 2,92 | 6 |
| 64  | atpH/atpF       | 3,47 | 6 | 107 | rbcL-2          | 2,91 | 6 |
| 183 | ndhB3'          | 3,47 | 6 | 168 | rpl2-1          | 2,87 | 6 |
| 56  | atpI-1          | 3,47 | 6 | 85  | rps4            | 2,84 | 6 |
| 116 | petA-1          | 3,46 | 3 | 245 | ndhA-2          | 2,82 | 6 |
| 39  | petN2           | 3,44 | 6 | 169 | rpl2int         | 2,76 | 6 |
| 100 | trnV-UAC-3      | 3,43 | 6 | 94  | ndhJ-1          | 2,73 | 6 |
| 63  | atpFintron2     | 3,41 | 4 | 166 | rps19/orf75     | 2,71 | 6 |
| 140 | psbH-1          | 3,40 | 6 | 160 | rpl14           | 2,70 | 3 |
| 108 | rbcL-3          | 3,39 | 6 | 5   | matK            | 2,69 | 6 |
| 150 | petD-3          | 3,37 | 6 | 164 | rps3            | 2,69 | 2 |
| 234 | psaC-1          | 3,36 | 5 | 213 | rrn23-4         | 2,67 | 6 |
| 212 | rrn23-3         | 3,32 | 5 | 128 | rpl33           | 2,65 | 5 |

|     |                |      |   |     |              |      |   |
|-----|----------------|------|---|-----|--------------|------|---|
| 166 | rps19/orf75    | 3,32 | 5 | 105 | atpB5'       | 2,61 | 5 |
| 54  | rps2-1         | 3,32 | 4 | 246 | ndhA-3       | 2,57 | 2 |
| 221 | ORF63//rps15   | 3,31 | 4 | 163 | rpl16-int    | 2,57 | 3 |
| 94  | ndhJ-1         | 3,30 | 5 | 172 | rpl23        | 2,55 | 6 |
| 247 | ndhA/ndhH      | 3,28 | 4 | 130 | rps18/rpl20  | 2,53 | 2 |
| 163 | rpl16-int      | 3,26 | 2 | 243 | ndhA-1       | 2,50 | 2 |
| 118 | psbJ3'         | 3,25 | 6 | 118 | psbJ3'       | 2,50 | 4 |
| 203 | trnI-GAU-1     | 3,24 | 6 | 248 | ndhH         | 2,49 | 3 |
| 148 | petB/D2        | 3,24 | 6 | 53  | rpoC2/rps2   | 2,47 | 5 |
| 126 | psaJ-2         | 3,24 | 6 | 8   | rps16 intron | 2,46 | 6 |
| 99  | trnV-UAC-2     | 3,22 | 6 | 247 | ndhA/ndhH    | 2,45 | 2 |
| 161 | rpl16-1        | 3,19 | 5 | 109 | psaI5'       | 2,41 | 6 |
| 171 | rpl2/rpl23     | 3,15 | 5 | 234 | psaC-1       | 2,40 | 6 |
| 220 | ORF63          | 3,14 | 6 | 165 | rps3/rpl22   | 2,39 | 2 |
| 69  | trnR           | 3,14 | 6 | 157 | infA         | 2,33 | 6 |
| 202 | rrn16/trnI     | 3,14 | 6 | 171 | rpl2/rpl23   | 2,33 | 5 |
| 102 | atpE-1         | 3,12 | 6 | 6   | trnkintron   | 2,30 | 5 |
| 139 | psbB-psbH      | 3,12 | 3 | 102 | atpE-1       | 2,30 | 6 |
| 144 | petBintron     | 3,10 | 4 | 40  | petN3        | 2,30 | 5 |
| 185 | ndhB-2         | 3,06 | 2 | 194 | rps12exon2   | 2,29 | 5 |
| 109 | psaI5'         | 3,06 | 6 | 161 | rpl16-1      | 2,27 | 6 |
| 190 | rps7-1         | 3,04 | 5 | 176 | orf241       | 2,27 | 2 |
| 164 | rps3           | 3,02 | 3 | 212 | rrn23-3      | 2,25 | 6 |
| 205 | trnlint        | 3,01 | 6 | 9   | rps16-1      | 2,24 | 5 |
| 125 | psaJ-1         | 3,01 | 5 | 70  | trnR/rps14   | 2,24 | 6 |
| 36  | psbM1          | 3,00 | 6 | 220 | ORF63        | 2,24 | 4 |
| 229 | ycf5-1         | 2,98 | 6 | 214 | rrn4.5       | 2,22 | 6 |
| 110 | psaI-1         | 2,98 | 4 | 180 | orf99/173    | 2,21 | 3 |
| 152 | rpoA5'         | 2,98 | 4 | 219 | trnN-GUU     | 2,16 | 6 |
| 141 | psbH-2         | 2,98 | 4 | 125 | psaJ-1       | 2,12 | 6 |
| 5   | matK           | 2,96 | 5 | 229 | ycf5-1       | 2,11 | 6 |
| 130 | rps18/rpl20    | 2,95 | 5 | 140 | psbH-1       | 2,09 | 6 |
| 44  | rpoB1          | 2,94 | 4 | 7   | rps16-2      | 2,09 | 6 |
| 181 | orf173-3'      | 2,94 | 3 | 39  | petN2        | 2,06 | 6 |
| 147 | petD-1         | 2,94 | 5 | 173 | rpl235'      | 2,04 | 5 |
| 157 | infA           | 2,93 | 4 | 14  | psbI         | 2,03 | 6 |
| 96  | ndhK           | 2,93 | 6 | 231 | ndhD-1       | 2,03 | 2 |
| 151 | petD/rppoA     | 2,93 | 5 | 151 | petD/rppoA   | 2,02 | 6 |
| 85  | rps4           | 2,90 | 5 | 37  | psbM2        | 2,00 | 6 |
| 204 | trnI-GAU-2     | 2,85 | 6 | 141 | psbH-2       | 2,00 | 6 |
| 159 | rps8/14/16     | 2,83 | 5 | 69  | trnR         | 1,99 | 6 |
| 172 | rpl23          | 2,80 | 6 | 152 | rpoA5'       | 1,98 | 5 |
| 37  | psbM2          | 2,79 | 6 | 193 | rps12int2-1  | 1,92 | 6 |
| 146 | petB/D1        | 2,78 | 5 | 223 | rps15/ndhF   | 1,83 | 6 |
| 211 | rrn23-2        | 2,77 | 6 | 10  | rps16-3      | 1,83 | 4 |
| 34  | trnD-GUC5'     | 2,72 | 2 | 236 | psaC/ndhE    | 1,75 | 6 |
| 26  | trnG-UCC/ORF69 | 2,69 | 3 | 221 | ORF63//rps15 | 1,74 | 5 |
| 145 | petB-3         | 2,66 | 6 | 200 | rrn16-1      | 1,73 | 6 |
| 25  | trnG-UCC       | 2,64 | 6 | 21  | ycf9/trnG    | 1,69 | 6 |
| 160 | rpl14          | 2,64 | 4 | 142 | petB-1       | 1,66 | 5 |
| 240 | ndhG-2         | 2,63 | 5 | 110 | psaI-1       | 1,64 | 5 |
| 70  | trnR/rps14     | 2,59 | 6 | 27  | ORF69        | 1,62 | 5 |
| 142 | petB-1         | 2,52 | 4 | 199 | rrn16-5'     | 1,58 | 6 |

|     |                |      |   |     |                |      |   |
|-----|----------------|------|---|-----|----------------|------|---|
| 173 | rpl235'        | 2,51 | 4 | 34  | trnD-GUC5'     | 1,58 | 4 |
| 124 | trnW/trnP      | 2,49 | 6 | 150 | petD-3         | 1,57 | 6 |
| 128 | rpl33          | 2,47 | 4 | 222 | rps15          | 1,57 | 5 |
| 105 | atpB5'         | 2,46 | 5 | 139 | psbB-psbH      | 1,56 | 6 |
| 200 | rrn16-1        | 2,44 | 6 | 225 | ndhF-2         | 1,51 | 2 |
| 215 | rrn5-1         | 2,44 | 6 | 239 | ndhG-1         | 1,50 | 2 |
| 7   | rps16-2        | 2,43 | 4 | 237 | ndhE           | 1,46 | 2 |
| 143 | petB-2         | 2,36 | 5 | 158 | rps8           | 1,46 | 5 |
| 197 | orf58/orf85    | 2,33 | 4 | 89  | trnL-UAA-1     | 1,43 | 6 |
| 20  | ycf9           | 2,33 | 4 | 144 | petBintron     | 1,42 | 6 |
| 4   | trnK1          | 2,29 | 6 | 211 | rrn23-2        | 1,42 | 6 |
| 236 | psaC/ndhE      | 2,22 | 5 | 149 | petDint-1      | 1,41 | 6 |
| 223 | rps15/ndhF     | 2,18 | 6 | 147 | petD-1         | 1,37 | 5 |
| 180 | orf99/173      | 2,18 | 3 | 181 | orf173-3'      | 1,37 | 6 |
| 10  | rps16-3        | 2,17 | 6 | 84  | trnS-GGA2      | 1,34 | 6 |
| 158 | rps8           | 2,17 | 2 | 143 | petB-2         | 1,31 | 4 |
| 209 | trnA-UGC-2     | 2,13 | 6 | 240 | ndhG-2         | 1,30 | 5 |
| 115 | cemA/petA      | 2,11 | 3 | 44  | rpoB1          | 1,30 | 6 |
| 196 | orf58-1        | 2,11 | 5 | 215 | rrn5-1         | 1,29 | 6 |
| 14  | psbI           | 2,05 | 5 | 146 | petB/D1        | 1,20 | 6 |
| 208 | trnA-int       | 2,05 | 6 | 175 | orf46/34/241   | 1,20 | 3 |
| 222 | rps15          | 2,05 | 3 | 224 | ndhF-1         | 1,16 | 5 |
| 207 | trnA-UGC-1     | 2,04 | 6 | 148 | petB/D2        | 1,13 | 6 |
| 216 | rrn5-2         | 2,00 | 6 | 111 | psaI-2         | 1,13 | 4 |
| 199 | rrn16-5'       | 1,96 | 6 | 115 | cemA/petA      | 1,11 | 5 |
| 49  | rpoC1/C2       | 1,94 | 4 | 90  | trnL-UAA-2     | 1,08 | 6 |
| 111 | psaI-2         | 1,94 | 5 | 4   | trnK1          | 1,08 | 6 |
| 47  | rpoB/rpoC      | 1,94 | 4 | 47  | rpoB/rpoC      | 1,07 | 3 |
| 90  | trnL-UAA-2     | 1,92 | 6 | 124 | trnW/trnP      | 1,07 | 6 |
| 224 | ndhF-1         | 1,91 | 3 | 49  | rpoC1/C2       | 0,95 | 3 |
| 219 | trnN-GUU       | 1,90 | 6 | 83  | trnS-GGA       | 0,94 | 6 |
| 30  | trnT-GGU3'     | 1,86 | 4 | 196 | orf58-1        | 0,92 | 4 |
| 24  | trnM-CAU       | 1,85 | 6 | 197 | orf58/orf85    | 0,91 | 3 |
| 89  | trnL-UAA-1     | 1,84 | 6 | 145 | petB-3         | 0,90 | 6 |
| 88  | trnT-UGU2      | 1,79 | 6 | 226 | ndhF/rpl32     | 0,88 | 2 |
| 227 | rpl32          | 1,69 | 4 | 203 | trnI-GAU-1     | 0,83 | 6 |
| 38  | petN1          | 1,53 | 5 | 88  | trnT-UGU2      | 0,73 | 6 |
| 21  | ycf9/trnG      | 1,52 | 6 | 33  | trnY-GUA       | 0,64 | 6 |
| 218 | trnR-ACG/orf23 | 1,49 | 6 | 227 | rpl32          | 0,62 | 6 |
| 41  | trnC-GCA1      | 1,40 | 6 | 29  | trnT-GGU       | 0,59 | 6 |
| 33  | trnY-GUA       | 1,38 | 6 | 38  | petN1          | 0,57 | 5 |
| 32  | trnE-UCC       | 1,37 | 6 | 30  | trnT-GGU3'     | 0,56 | 6 |
| 29  | trnT-GGU       | 1,36 | 6 | 22  | trnG-GCC       | 0,56 | 6 |
| 217 | trnR-ACG       | 1,35 | 6 | 216 | rrn5-2         | 0,51 | 6 |
| 83  | trnS-GGA       | 1,33 | 6 | 19  | trnS-UAG       | 0,49 | 6 |
| 206 | trnI/trnA      | 1,32 | 6 | 91  | trnL/trnF      | 0,42 | 4 |
| 22  | trnG-GCC       | 1,29 | 6 | 174 | trnI-CAU       | 0,42 | 6 |
| 91  | trnL/trnF      | 1,24 | 6 | 26  | trnG-UCC/ORF69 | 0,40 | 6 |
| 28  | trnT-GGU5'     | 1,21 | 6 | 202 | rrn16/trnI     | 0,38 | 6 |
| 84  | trnS-GGA2      | 1,18 | 6 | 87  | trnL-UAA1      | 0,36 | 6 |
| 42  | trnC-GCA2      | 1,15 | 6 | 24  | trnM-CAU       | 0,35 | 6 |
| 86  | trnT-UGU       | 1,12 | 6 | 92  | trnF-GAA       | 0,35 | 6 |
| 228 | trnL-UAG       | 1,11 | 6 | 98  | trnV-UAC-1     | 0,30 | 6 |

|     |            |      |   |     |                |       |   |
|-----|------------|------|---|-----|----------------|-------|---|
| 167 | trnH-GUG   | 1,08 | 6 | 41  | trnC-GCA1      | 0,27  | 6 |
| 15  | trnS-GCU   | 1,06 | 6 | 23  | trnG/trnfM     | 0,24  | 6 |
| 31  | trnE/trnY  | 1,04 | 6 | 198 | trnV-GAC       | 0,17  | 6 |
| 182 | trnL-CAA   | 1,01 | 6 | 15  | trnS-GCU       | 0,14  | 6 |
| 11  | trnQ       | 0,97 | 6 | 11  | trnQ           | 0,12  | 6 |
| 87  | trnL-UAA1  | 0,93 | 6 | 205 | trnIint        | 0,02  | 6 |
| 35  | trnD-GUC   | 0,92 | 6 | 31  | trnE/trnY      | 0,00  | 6 |
| 210 | rrn23-1    | 0,89 | 6 | 228 | trnL-UAG       | 0,00  | 6 |
| 23  | trnG/trnfM | 0,89 | 6 | 204 | trnI-GAU-2     | 0,00  | 6 |
| 198 | trnV-GAC   | 0,75 | 6 | 32  | trnE-UCC       | -0,03 | 6 |
| 174 | trnI-CAU   | 0,73 | 6 | 42  | trnC-GCA2      | -0,04 | 6 |
| 19  | trnS-UAG   | 0,66 | 6 | 182 | trnL-CAA       | -0,07 | 6 |
| 92  | trnF-GAA   | 0,64 | 6 | 218 | trnR-ACG/orf23 | -0,10 | 6 |
| 101 | trnM-CAU   | 0,54 | 6 | 101 | trnM-CAU       | -0,14 | 6 |
|     |            |      |   | 167 | trnH-GUG       | -0,21 | 6 |
|     |            |      |   | 28  | trnT-GGU5'     | -0,27 | 6 |
|     |            |      |   | 100 | trnV-UAC-3     | -0,28 | 6 |
|     |            |      |   | 35  | trnD-GUC       | -0,31 | 6 |
|     |            |      |   | 217 | trnR-ACG       | -0,33 | 6 |
|     |            |      |   | 86  | trnT-UGU       | -0,46 | 6 |
|     |            |      |   | 99  | trnV-UAC-2     | -0,56 | 5 |
|     |            |      |   | 209 | trnA-UGC-2     | -1,16 | 6 |
|     |            |      |   | 210 | rrn23-1        | -1,37 | 6 |
|     |            |      |   | 25  | trnG-UCC       | -1,45 | 6 |
|     |            |      |   | 208 | trnA-int       | -2,36 | 6 |
|     |            |      |   | 206 | trnI/trnA      | -2,62 | 6 |
|     |            |      |   | 207 | trnA-UGC-1     | -2,64 | 6 |

---
