# Supplementary material for: ZmpTAC12 binds single‐stranded nucleic acids and is essential for accumulation of the plastid‐encoded polymerase complex in maize
Source: PubMed Central journal article supplement (PMC6680207; doi:10.1111/nph.13248), 2015-01-19
Supplement: NPH-206-1024-s003.pdf [file NPH-206-1024-s003.pdf]

## Supporting Information

**Methods S1** *Arabidopsis* transformation with full-length maize *ZmpTAC12* cDNA.

### Vector construction

The *ZmpTAC12*-HA fusion construct (3xHA as C-terminal tag) used for *Arabidopsis* transformation was obtained by Gateway cloning into pGWB14 (Nakagawa et al., 2007). The coding sequences of *ZmpTAC12* was PCR amplified from maize cDNA (ZM\_BFb0227G12), transferred into pDONR221 (pEnter221\_Zm12-14), and recombined into pGWB14 (pGWB14\_Zm12-3xHA). All plasmids were sequenced to verify that no errors were introduced.

### Transgenic Plant Production

The pGWB14\_Zm12-3xHA plasmid was introduced into *Agrobacterium tumefaciens* strain GV3101. *Arabidopsis* plants were transformed by the floral dip method (Clough and Bent, 1998). Transformants were selected on MS medium with sucrose supplemented with the 50 µg/ml hygromycin and allowed to self-pollinate. Seeds were surface sterilized, cold treated for 2 days, and germinated under controlled condition (21°C and a 16 h light / 8 h dark photoperiod). Total proteins for immunoblot analysis were isolated from leaves of 5-7 day-old seedlings.

**Nakagawa T, Kurose T, Hino T, Tanaka K, Kawamukai M, Niwa Y, Toyooka K, Matsuoka K, Jinbo T, Kimura T. (2007).** Development of series of Gateway binary vectors, pGWBs, for realizing efficient construction of fusion genes for plant transformation. *J Biosci Bioeng* 104: 34–41.

**Clough SJ, Bent AF. (1998).** Floral dip: a simplified method for *Agrobacterium*-mediated transformation of *Arabidopsis thaliana*. *Plant J* 16: 735-743.
